# Supplementary material for: Ultrasensitive chemiluminescent immunoassay labeled with graphene oxide
Source: Royal Society of Chemistry journal article supplement (doi:10.1039/c3ay40737c), 2013-01-01
Supplement: c3ay40737c.pdf [file c3ay40737c.pdf]

Electronic Supplementary Information (ESI)

## Ultrasensitive chemiluminescent immunoassay labeled with graphene oxide

Yinhuan Song, Taoyi Yang, Tonghuan Zhang, Nan Jin, Yanjun Zhao, Aiping Fan\*

Tianjin Key Laboratory for Modern Drug Delivery & High-Efficiency, School of  
Pharmaceutical Science and Technology, Tianjin University, Tianjin 300072,  
People's Republic of China. Fax: +86-22-87440581; Tel: +86-22-87440581; E-mail:  
fanap@tju.edu.cn

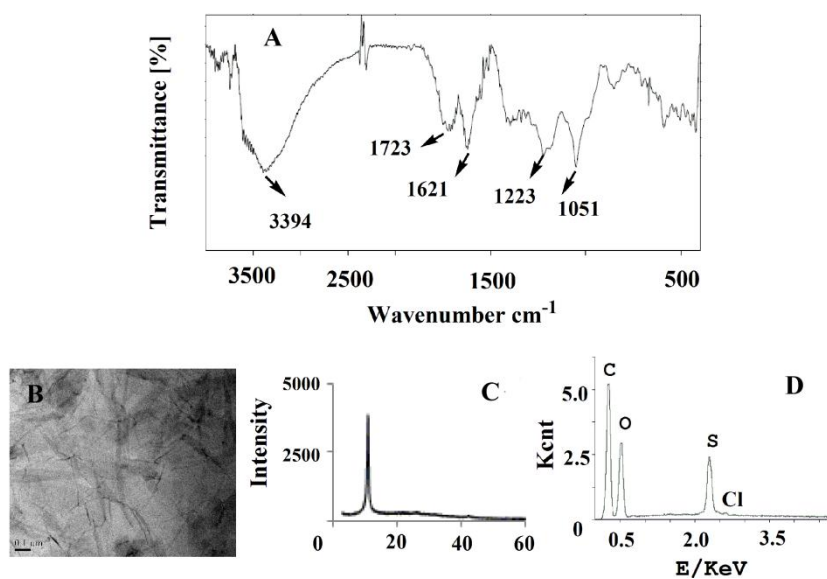

**Figure S1.** (A) FT-IR spectrum of GO. (B) TEM image of GO. (C) XRD pattern of GO. (D) EDX analysis spectrum of GO.

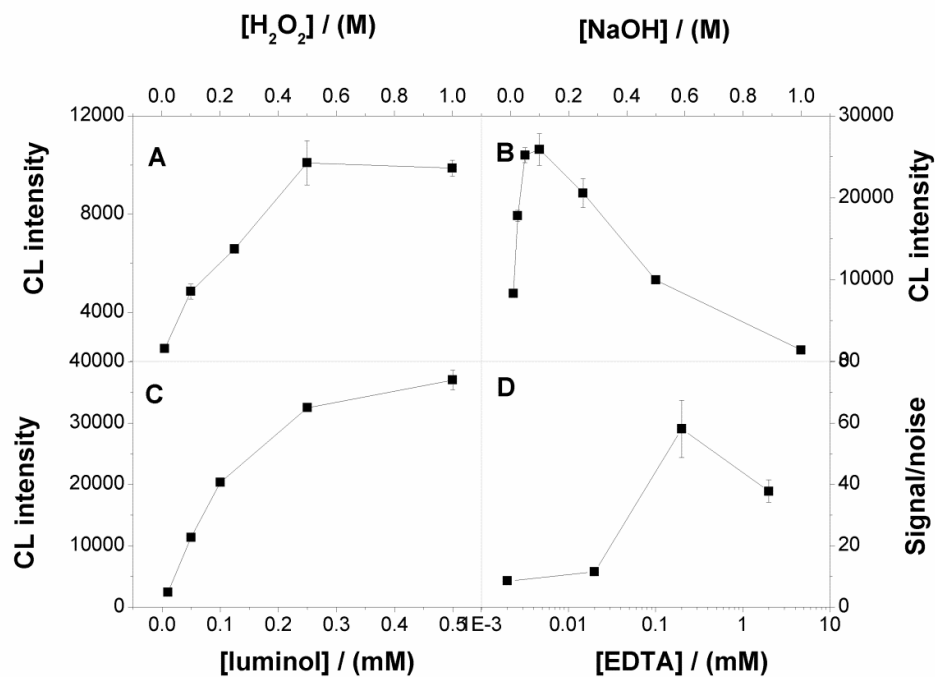

**Figure S2.** Effects of the reactant conditions on the luminol-H<sub>2</sub>O<sub>2</sub>-GO CL system. (A) Effect of H<sub>2</sub>O<sub>2</sub> concentration, experimental conditions: luminol (diluted in 0.01 M NaOH), 0.2 mM; EDTA, 0.2 mM; GO, 20 µg/mL. (B) Effect of NaOH concentration, experimental conditions: H<sub>2</sub>O<sub>2</sub>, 0.5 M; other experimental conditions were the same as (A). (C) Effect of luminol concentration, experimental conditions: H<sub>2</sub>O<sub>2</sub>, 0.5 M; luminol (diluted in 0.1 M NaOH); other experimental conditions were the same as (A). (D) Effect of EDTA concentration, experimental conditions: H<sub>2</sub>O<sub>2</sub>, 0.5 M; luminol (diluted in 0.1 M NaOH), 0.1 mM; GO, 20 µg/mL.

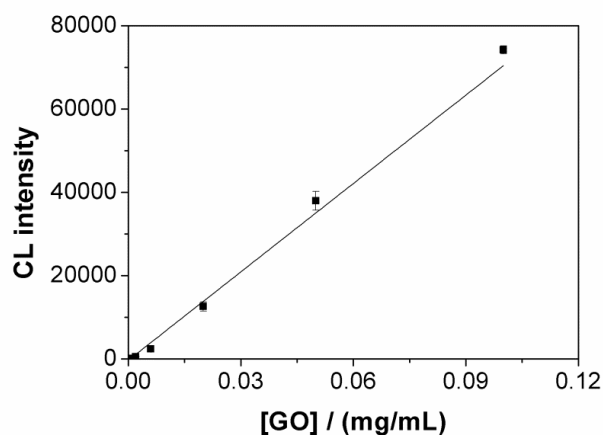

**Figure S3.** CL intensity vs. different concentrations of GO. Experimental conditions: H<sub>2</sub>O<sub>2</sub>, 0.5 M; luminol (diluted in 0.1 M NaOH) 0.1 mM; EDTA, 0.2 mM.

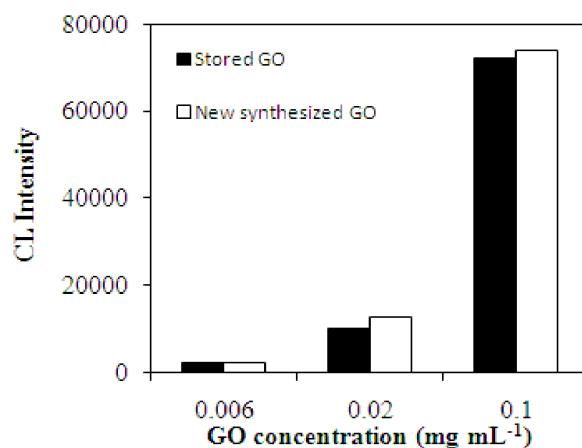

**Figure S4.** Comparison of catalytic property between new synthesized GO and stored GO. Experimental conditions: H<sub>2</sub>O<sub>2</sub>, 0.5 M; luminol (diluted in 0.1 M NaOH), 0.1 mM; EDTA, 0.2 mM.

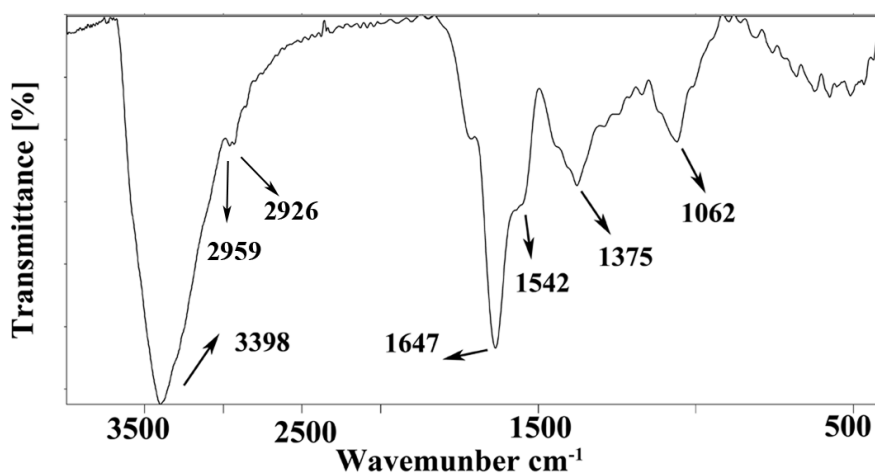

**Figure S5.** FT-IR spectrum of Ab<sub>2</sub>-GO

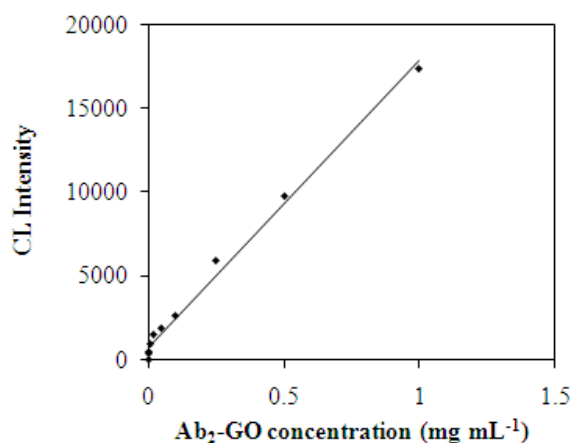

**Figure S6.** CL intensity vs. different concentrations of Ab<sub>2</sub>-GO. Experimental conditions: H<sub>2</sub>O<sub>2</sub>, 0.5 M; luminol (diluted in 0.1 M NaOH ) 0.1 mM; EDTA, 0.2 mM.

**Table S1.** Comparison of Immunoassay Methods developed for IgG

| Analytical method                             | Label      | Detection limit | Ref       |
|-----------------------------------------------|------------|-----------------|-----------|
| Electrochemical assay                         | label-free | 3 ng/mL         | S1        |
| Electrochemical assay                         | HRP        | 25 ng/mL        | S2        |
| Amperometry                                   | HRP        | 1.2 ng/mL       | S3        |
| Potentiometric flow injection analysis        | Urease     | 1200 ng/mL      | S4        |
| Voltammetry at interdigitated array electrode | AP         | 10 ng/mL        | S5        |
| Time-resolved fluorescence assay              | AP         | 0.03 ng/mL      | S6        |
| Fluorescence assay                            | HRP        | 2 ng/mL         | S7        |
| Flow injection chemiluminescence detection    | Au         | 0.52 ng/mL      | S8        |
| Chemiluminescence detection                   | GO         | 1.2 pg/mL       | This work |
| Surface plasmon resonance                     | Au         | 30 ng/mL        | S9        |
| Atomic absorption spectral assay              | Au         | 8 ng/mL         | S10       |

**Table S2.** Results of the determination of human IgG in diluted serum using GO based CLIA (n=3)

| Human IgG<br>Added (pg) | Human IgG<br>Found (pg) | Recovery (%) | R. S. D.(%) |
|-------------------------|-------------------------|--------------|-------------|
| 1                       | 0.98                    | 98.4         | 2.1         |
| 10                      | 9.14                    | 91.4         | 16.8        |
| 100                     | 113.90                  | 113.9        | 14.8        |

#### References

- [S1] L. P. Qiu, C. C. Wang, P. Hu, *Talanta*, 2010, **83**, 42-47.
- [S2] H. Zarei, H. Ghourchian, K. Eskandari, *Anal. Biochem*, 2012, **421**, 446-453.
- [S3] Z. J. Wang, Y. H. Yang, J. S. Li, *Talanta*, 2006, **69**, 686-690.
- [S4] S. Sole, S. Alegret, F. Cespedes, E. Fabregas, T. Diez-Caballero, *Anal. Chem*, 1998, **70**, 1462-1467.
- [S5] R. A. Evangelista, A. Pollak, E. F. Templeton, *Anal. Biochem*, 1991, **197**, 213-224.
- [S6] O. Niwa, H. B. Halsall, W. R. Heineman, *Anal. Chem*, 1993, **65**, 1559-1563.
- [S7] P. Lin, Y. L. Wang, J. J. Feng, *Chinese. J. Chem*, 2008, **26**, 794-798.
- [S8] H. L. Qi, S. G. Li, L. Liang, *Spectrochim. Acta. A*, 2011, **82**, 498-503.
- [S9] H. E. Yeritsyan, V. K. Gasparyan, *Microchim. Acta*, 2012, **176**, 117-122.
- [S10] Y. F. Tang, C. Jiang, A. H. Liang, *Bioproc. Biosyst. Eng*, 2011, **34**, 471-476.
